1 **Conserved transcriptomic profile between mouse and human colitis**  
2 **allows temporal dynamic visualization of IBD-risk genes and**  
3 **unsupervised patient stratification**

4

5 Paulo Czarnewski<sup>1</sup>, Sara M. Parigi<sup>1</sup>, Chiara Sorini<sup>1</sup>, Oscar E. Diaz<sup>1</sup>, Srustidhar Das<sup>1</sup>, Nicola  
6 Gagliani<sup>1,2,§</sup>, Eduardo J. Villablanca<sup>1,§,\*</sup>

7

8 <sup>1</sup> Immunology and Allergy Unit, department of Medicine, Solna, Karolinska Institute and  
9 University Hospital, 17176 Stockholm, Sweden

10 <sup>2</sup> I. Department of General, Visceral and Thoracic Surgery / Department of Medicine,  
11 University Medical Center Hamburg-Eppendorf, 20246 Hamburg, Germany.

12

13 § These authors jointly supervised this work.

14 \* Corresponding author

15 Eduardo J. Villablanca, PhD

16 Immunology and Allergy Unit, L2:04,

17 Karolinska Institutet,

18 Stockholm, SE17176

19 E-mail: [eduardo.villablanca@ki.se](mailto:eduardo.villablanca@ki.se) (EJV)

## 20 **Abstract**

21 Despite the fact that ulcerative colitis (UC) patients show heterogeneous clinical manifestation  
22 and diverse response to biological therapies, all UC patients are classified as one group.  
23 Therefore, there is a lack of tailored therapies. In order to design these, an unsupervised  
24 molecular re-classification of UC patients is evoked. Classical clustering approaches based  
25 on tissue transcriptomic data were not able to classify UC patients into subgroups, likely due  
26 to associated covariates. In addition, while genome wide association studies (GWAS) have  
27 identified potential new target genes, their temporal dynamic revealing the optimal therapeutic  
28 window of time remains to be elucidated. To overcome the limitations, we generated time-  
29 series transcriptome data from a mouse model of colitis, which was then cross-compared with  
30 human datasets. This allowed us to visualize IBD-risk gene expression kinetics and reveal  
31 that the expression of the majority of IBD-risk genes peak during the inflammatory phase, and  
32 not the recovery phase. Moreover, by restricting the analysis to the most differentially  
33 expressed genes shared between mouse and human, we were able to cluster UC patients  
34 into two subgroups, termed UC1 and UC2. We found that UC1 patients expressed higher  
35 copy of genes involved in neutrophil recruitment, activation and degranulation compared to  
36 UC2. Of note, we found that over 87% of UC1 patients failed to respond to two of the most  
37 widely-used biological therapies for UC.

38 This study serves as a proof of concept that cross-species comparison of gene expression  
39 profiles enables the temporal annotation of disease-associated gene expression and the  
40 stratification of patients as of yet considered molecularly undistinguishable.

## 41 **Introduction**

42 Ulcerative colitis (UC) is a type of inflammatory bowel diseases (IBD) that is mostly restricted  
43 to the colon and is characterized by changes in the mucosal architecture, epithelial function,  
44 increase in immune cell infiltration and an elevated concentration of inflammatory cytokines.  
45 Symptoms include diarrhea, abdominal pain, rectal bleeding, lack of appetite and fatigue, all  
46 of which significantly affect patient's quality of life. UC is recognized as a heterogeneous  
47 disease, presenting diverse macroscopic features, symptoms, grads of inflammation and  
48 colonic affected areas <sup>1,2</sup>.

49 Although there is no definitive cure for UC, there are biological therapies available which  
50 target the inflammatory response during UC by means of inhibiting pro-inflammatory  
51 cytokines or by blocking immune cell migration <sup>3</sup>. Among these, the most frequently used  
52 biological therapies in UC patients block tumor necrosis factor (TNF) with anti-TNF antibodies  
53 (such as infliximab, IFX) <sup>4</sup> or leukocyte migration (such as vedolizumab, VDZ) <sup>5 6</sup>. However,  
54 about 35% <sup>4,6</sup> and 50% <sup>5,6</sup> of patients poorly achieve clinical response to IFX and VDZ,  
55 respectively. Patients that do not respond develop adverse effects, most notably increased  
56 risk of infections, thus requiring continuous medical monitoring and ultimate surgical  
57 intervention <sup>7,8</sup>.

58 In an attempt to identify genes/pathways as a potential novel therapeutic target, genome wide  
59 association studies (GWAS) have identified more than 200 polymorphisms associated with  
60 higher susceptibility to IBD <sup>9,10</sup>. However, the function and temporal expression of IBD risk  
61 genes during experimental colitis are yet to be elucidated <sup>9,10</sup>.

62 Furthermore, while there is an obvious clinical heterogeneity among UC patients as seen for  
63 example by the location affected (i.e. distal colitis, left-sided and pancolitis, and responder  
64 and non-responder) and the extent of the severity, initial treatment for these patient  
65 subgroups is identical and modified only if the patients have not responded <sup>6,8</sup>. Biomarkers  
66 that could distinguish the different entities of the UC spectrum are currently lacking and they  
67 are required in order to achieve the highly needed stratification of UC patients into  
68 molecularly functional subgroups <sup>8,11</sup>. Moreover, an unbiased stratification of UC subtypes

69 has never been accomplished at the molecular and functional levels. Here, using  
70 transcriptomic data from a well-characterized experimental model of colitis we were able to  
71 identify conserved genes between mouse and UC patients. As a result, we were able to gain  
72 insights into IBD-risk gene kinetics and to molecularly stratify UC patients in an unsupervised  
73 manner.

## 74 **Results**

### 75 **Human UC is highly variable at the transcriptome level**

76 In order to molecularly stratify UC patients into subgroups, we combined 4 publicly available  
77 human UC cohort datasets (n=102 patients), in which transcriptomic microarrays of total  
78 colonic biopsies was performed<sup>12-15</sup> (**Table 1** and **Fig S1**). We ranked genes using the top  
79 100 most variable genes and further tested whether molecular subgroups exist (**Fig 1a**).  
80 Analysis by visual assessment of cluster tendency (VAT)<sup>16</sup> indicated that biopsies presented  
81 high inter-sample dissimilarities (**Fig 1b**), suggesting a poor overall tendency to form  
82 consistent clusters. Dimensionality reduction analysis by tSNE using the top highly variable  
83 genes also indicates the formation of a single group with no apparent subdivisions (**Fig 1c**).  
84 Then, we further statistically tested whether multi-cluster substructures were present in the  
85 dataset, since most clustering algorithms define subgroups even on random noise<sup>17-19</sup>.  
86 However, bootstrapping analysis using the Hartigan's Dip test<sup>19,20</sup> presented a low cluster  
87 substructure trend ( $p > 0.9$ ), regardless of the gene ranking metrics used (**Fig 1d**).  
88 Independently of the clustering tendency results, we forced patient subdivision using  
89 hierarchical clustering and tested for cluster stability using bootstrapping<sup>17,18,21</sup>. In line with  
90 previous results, formed clusters were highly unstable using the list of highly variable genes  
91 (AU  $\approx$  0%) (**Fig 1e**). These results indicate that without prior knowledge of patient subdivision,  
92 standard gene ranking strategies do not allow clustering of UC patients into molecularly  
93 distinct subgroups.

94

### 95 **Time-series reveals processes underlying colon inflammation and repair**

96 One cause of such inter-patient variability can be attributed to the sampling procedure, which  
97 contributes largely to the total data variance and masks real biological differences<sup>22,23</sup>. To  
98 overcome the total data variance, we sought to identify the genes that contribute to  
99 inflammation in an independent and unsupervised manner. To this end, we focused the

100 analysis on a list of evolutionarily conserved genes that best discriminate the nuances of  
101 inflammation in a well-characterized colitis mouse model<sup>24</sup>.

102 To identify these evolutionarily conserved genes, we first elucidated through an unbiased  
103 manner which genes and pathways are differentially regulated during mouse colonic  
104 inflammation followed by a tissue regeneration phase. In particular, we took advantage of the  
105 widely used dextran sodium sulfate (DSS)-induced model of colitis. This model is one of the  
106 few characterized by a phase of damage followed by a phase of regeneration. Therefore, this  
107 model gave the possibility to identify also sets of genes essential in the regeneration phase, a  
108 key step towards the resolution of the inflammation. In short, mice were exposed to DSS in  
109 the drinking water for 7 days, then allowed to recover for the following 7 days. During this  
110 period, we collected colonic tissue samples every second day to then be analyzed by RNA  
111 sequencing (RNA-seq), histology and flow cytometry (**Fig 2a and Fig S2**). First, we confirmed  
112 that 7 days of DSS exposure resulted in continuous body weight loss and acute disease  
113 severity until day 10 to then initiate the recovery phase (**Fig S2a-b**). Histological analysis  
114 confirmed epithelial damage, such as desquamation of the epithelial layer on day 6 (**Fig S2c**),  
115 while labeling proliferating cells within crypts (Ki67 staining) indicated disrupted crypt  
116 architecture by day 6 and restoration by d14 (**Fig S2c**). Loss of the epithelial cells  
117 (CD45<sup>neg</sup>EpCAM<sup>+</sup>) by day 7-10 and restoration by day 14 was further confirmed by flow  
118 cytometry (**Fig S2d**). To test whether the epithelial barrier integrity was restored by day 14,  
119 we gavaged FITC-dextran and measured its concentration in the serum. We detected higher  
120 FITC-dextran concentrations on day 7, which indicates barrier disruption, whereas basal  
121 levels were detected by day 14 indicating restoration of the barrier integrity (**Fig S2e**). Thus,  
122 on the basis of this characterization we will refer to d6-d10 and d12-d14 as acute phase and  
123 recovery phase, respectively.

124 Next, we performed a RNA-seq analysis from colonic samples throughout the experiment and  
125 computed differentially expressed genes (DEGs) taking the complete kinetics of expression  
126 into consideration for p-value estimation using EdgeR<sup>25</sup> (see Methods). A detailed list of all  
127 genes found differentially expressed is available for further exploration (**Table S1**). Principal  
128 component analysis (PCA) on DEGs revealed that samples displayed a sequential temporal

129 path in PCA space, starting on day 0, passing through day 7 (acute) and ultimately reaching  
130 day 14 (recovery) (**Fig 2b**). Of note, samples from day 14 did not reach the same gene  
131 expression profile compared to day 0, suggesting that complete molecular restoration was not  
132 reached by day 14. We observed that over 70% of the variance among the differentially  
133 expressed transcripts is retained in the first 5 principal components (PCs) (**Fig S3a**), and that  
134 each principal component corresponds to a unique expression kinetic through the time course  
135 of DSS-colitis (**Fig S3b**). For instance, the variance explained by PC1 peaked at the acute  
136 phase and returned to almost normal levels on day 14 (recovery), capturing most of the  
137 variance related to inflammatory genes that peaked from days 7 to 10, such as *Ly6g*, *Reg3b*,  
138 *Reg3g*, *S100a8*, *S100a9*, *Mmp3*, *Mmp8*, *Mmp10* (**Fig S3b and c**). On the other hand, the  
139 variance explained by PC2 peaked on day 4 during DSS administration, to return close to  
140 normal by day 7, thus, capturing most of the variance related to genes expressed during  
141 initiation of inflammation, such as *Mcpt1*, *Mcpt2*, *Mmp3*, *Mmp10*, *Il11*, *Scnn1g* and *Best2* (**Fig**  
142 **S3b and c**). These results indicate that several of the genes modulated between days 4-10  
143 are related to inflammation and together contribute the most to the variance in the dataset.

144

145 By using hierarchical clustering on the spline smoothed gene expression of DEGs, we were  
146 able to classify the gene expression into 9 modules (**Fig 2c**). For further exploration,  
147 expression values for all genes in each module are available (**Table S1**). Three gene modules  
148 (m2, m7 and m8) were down regulated during the acute and recovery phases of DSS-induced  
149 inflammation, with lowest peak on days 6, 10 and 12, respectively. GO and KEGG enrichment  
150 analysis suggest that these modules represent genes mainly involved with epithelial cell  
151 functions, such as PPAR signaling (*Acs11*, *Fabp1*), small molecule metabolism (*Sult1a1*,  
152 *Sult1b1*) and fat digestion and absorption (*Paqr8*, *Clps*, *Pla2g3*) (**Fig 2c and Fig S4a**).

153 On the other hand, six modules (m9, m3, m1, m4, m6 and m5) were up-regulated over the  
154 early, acute and recovery phases of DSS-induced inflammation, peaking on days 2, 6, 7, 10,  
155 12 and 14, respectively. Among those, processes such as cytokine signaling (*Il11*, *Il12b*, *Il6*,  
156 *Il1b*), leukocyte migration (*Sell*, *Ccr1*, *Ccr2*, *Cxcl2*, *Cxcr3*), neutrophil degranulation (*Ly6g*,

157 *Itgam*, *Itgax*, *Cd300a*), matrix remodeling (*Mmp3*, *Mmp7*, *Mmp10*), response to  
158 lipopolysaccharide (*Saa3*, *Nox2*) as well as several inflammatory signaling pathways (*Stat3*,  
159 *Jak3*, *Nfkbia*, *Smad4*, *Birc3*) were enriched, suggesting the interplay of several immune cells  
160 and pathways as a cause/trigger of inflammation, especially during the acute phase (**Fig 2c**  
161 **and Fig S4b**). Moreover, modules m9 and m5 presented two degrees of bimodal expression  
162 pattern, peaking at day 2-4 (early phase), with slight down-regulation between days 7-10 and  
163 a second peak on days 12-14 (recovery phase). Genes in those modules were associated  
164 mainly with cell cycle (*Ttk*, *Cdc7*, *Cdc20*, *Cdc25c*, *Ccna2*, *Ccnb1*, *Ccnb2*) and cholesterol  
165 biosynthetic pathways (*Acat2*, *Sqle*, *Mvd*, *Hmgcs1*), respectively (**Fig 2c and Fig S4b**). Many  
166 other genes and GO/KEGG pathways not shown here are fully accessible for exploration of  
167 individual genes and their clusters (**Table S1, S2 and S3**). Taken together, time-series  
168 transcriptomic characterization of mouse colonic inflammation identifies distinct gene  
169 expression kinetics associated with epithelial and immune cell related pathways during the  
170 course of colitis.

171

## 172 **Inflammatory pathways are the most conserved between mouse and human colitis**

173 Having characterized genes and pathways that are associated with intestinal inflammation  
174 and tissue repair during experimental colitis, we investigated whether such pathways are  
175 conserved in humans. To this end, we compared the list of DEGs from the mouse  
176 experimental colitis with the recently published list of DEGs found in newly diagnosed  
177 treatment-naïve ulcerative colitis patients<sup>26</sup>. This is a cohort containing human RNA-seq data,  
178 where they report DEGs between UC patients versus healthy controls. We found that among  
179 the 4045 mouse DEG, 650 genes were also found among the list of DEG obtained comparing  
180 UC patients versus healthy controls (**Fig 2d and TableS4**). Out of the 650 genes shared  
181 between mouse and humans, 53.9% were identified in the inflammatory modules m1 (28.2%),  
182 m3 (14.2%) and m4 (11.5%) (**Fig 2d**). This suggests that acute inflammatory genes in m1,  
183 m3 and m4 are conserved between DSS-induced colitis and UC. GO and KEGG enrichment  
184 analysis revealed that those 650 genes were enriched for inflammatory pathways related to



185 neutrophil degranulation and chemotaxis, as well as cytokine and inflammatory signaling  
186 pathways (**Fig 2e** and **TableS5**). These results showed that most of the genes/pathways  
187 conserved between experimental mouse colitis and human UC are associated with  
188 inflammatory responses.

189

## 190 **Forward translation from mouse to human UC patients allows the temporal** 191 **classification of the IBD risk genes**

192 To understand the temporal expression of the genes associated with the identified IBD  
193 polymorphisms (candidate IBD risk genes)<sup>9</sup>, we checked the expression of genes associated  
194 with UC or CD identified by single variant fine-mapping resolution<sup>10</sup> into the list of DEGs from  
195 the mouse dataset. Out of the 233 reported candidate IBD risk genes, 40 genes presented  
196 very low or undetectable counts in the mouse dataset (i.e., *IL23R*, *SULT1A2*, *ERAP2*,  
197 *MUC19*), 118 were detected but did not have their expression altered through the  
198 development of inflammation (i.e., *TNFRSF14*, *ATG16L1*, *GPR35*, *TNFSF8*) and 75 were  
199 found among the DEGs in our mouse dataset (**Fig S5a** and **Table S6**). Among these, many  
200 IBD-risk genes with already known functions during mouse colitis were found (e.g. *IFNG*,  
201 *GPR65*, *ITGAL*, *CCL7*, *STAT3*, *FUT1*, *CD40*, *SULT1A1*, *MUC1*, *CARD9*, *IL12B*, *IRF1*, *CD5*),  
202 being specifically present in gene modules related to inflammation m1, m3 and m4. Moreover,  
203 26 genes of the 75 IBD risk genes found in our dataset are shared between UC and CD (i.e.  
204 *CARD9*, *SULT1A1*, *STAT3*, *GPR65*, *IL12B*), while 10 and 39 were restricted to UC or CD,  
205 respectively (**Fig S5b** and **Table S7**). In order to provide temporal information regarding the  
206 expression of IBD-risk genes during inflammation and repair, we utilized the mouse  
207 transcriptional landscape to map at which time point homolog IBD risk-genes were up- or  
208 down-regulated. Out of the 75 genes shared between mouse DEGs and IBD risk genes, 45  
209 (60%) were mapped to modules m1, m3 and m4, which represent the acute phase of  
210 inflammation (**Fig S5c** and **Table S7**). Among them we found *Card9*, *Ifng*, *Il12b*, *Stat3*, *Stat4*,  
211 *Cd40*, which have been reported to exert functions during the acute phase of intestinal  
212 inflammation<sup>27-32</sup>. By contrast, *Fut1*, *Sult1a1*, *Hes5* and *Tnfsf15* were mapped to modules

213 m8, m7 and m2, which are down-regulated during acute inflammation, while *Rasip*, *Ntn5* and  
214 *Rtel1* matched with module 6 which is associated with genes that are up-regulated during the  
215 recovery phase after acute inflammation (**Fig S5c**). These data thus provided temporal  
216 information on when IBD risk genes are differentially expressed during damage and tissue  
217 repair, providing useful insights into their potential roles during inflammation and recovery.

218

### 219 **Key conserved inflammatory genes distinguish two human ulcerative colitis** 220 **subgroups**

221 Having identified genes that contribute to inflammatory pathways that are conserved between  
222 mice and humans, we next used those genes to assess whether UC patients can be  
223 subdivided into subgroups (**Table1**, **Fig 3a**). To this end, we selected the top 100 leading  
224 genes in PC1 and PC2 from the mouse colitis dataset and identified the respective human  
225 homologs (**Fig 3a**). We found that 57 genes were shared between mice and humans. Of  
226 these, only 17 genes were found among the 100 most variable genes of the human dataset  
227 (**Fig S6**), which might explains why patient classification using highly variable genes was not  
228 possible.

229 Therefore, we performed an unsupervised analysis of the human dataset using the 57  
230 homolog genes (**Fig 3a**). Of note, VAT analysis using these 57 homolog genes indicated the  
231 distinction into 2 major patient subgroups (**Fig 3b**), which also resulted in reduced Hartigan's  
232 unimodality test ( $p < 0.001$ , **Fig 3c**). This indicates that by using mouse most variable genes  
233 as opposed to the sole top human variable ones, it is possible to obtain higher clustering  
234 tendency of the UC patient data. To test whether using the mouse homologs also impacted  
235 on cluster stability, we performed a bootstrapping analysis. This time, clustering using the top  
236 mouse homolog genes resulted in clusters with higher stability ( $AU \approx 80\%$ ) (**Fig 3d**),  
237 compared to using the top human highly variable genes ( $AU \approx 0\%$ ) (**Fig 1e**). Hierarchical  
238 agglomerative clustering using the mouse homolog genes thus defined 2 UC subtypes,  
239 namely UC1 and UC2, comprising 60 and 42 patients, respectively (**Fig 3e**). The UC1  
240 subgroup is defined as patients presenting the higher average expression of the inflammatory

241 genes compared to UC2 (**Fig 3f**). We also observed that neither UC1 nor UC2 subtypes were  
242 discriminated by the overall macroscopic disease severity (**Fig 3g**), suggesting that although  
243 these two UC subtypes are indistinguishable based on Mayo score, they are transcriptionally  
244 distinct.

245

#### 246 **UC1 and UC2 are transcriptionally distinct**

247 In order to characterize UC1 and UC2 beyond conserved genes, we performed differential  
248 expression analysis using all genes present in the human dataset. We were able to identify  
249 205 highly differentially expressed genes, among which 187 were up-regulated in UC1 and 18  
250 were up-regulated in UC2 (**Fig 4a**). Detailed tables with information on all DEGs comparing  
251 UC1 and UC2 are available for exploration (**Table S8 and Fig S7a**). Among those, cytokines  
252 (*TNF*, *IL11*), enzymes (*NOX1*, *MMP3*, *CYP26B1*), calcium-binding proteins (*S100A8*,  
253 *S100A9*), chemokines (*TREM1*, *CXCL8*) and other proteins related to the inflammatory  
254 response (*NR3C2*, *BCL2A1*, *PARM1*, *TNFSF13B*) were clearly able to discriminate UC1 from  
255 UC2 (**Fig 4b and Fig S7**). Enrichment analysis for cell types, GO, and KEGG pathways  
256 revealed that genes highly expressed in UC1 (187) were associated with terms related to  
257 neutrophil, neutrophil degranulation and cytokine-cytokine receptor interaction, respectively  
258 (**Fig S7b**). Venn diagram of the top enriched terms revealed many overlapping genes are  
259 shared among these pathways (**Fig 4c**), suggesting that UC1 patients present a distinct  
260 transcriptional signature enriched in neutrophil activity and cytokine signaling compared to  
261 UC2 patients.

262 We trained a logistic regression classifier using each of the DEGs between UC1 and UC2 to  
263 identify key genes that could be further used in the clinics for distinction of UC1 and UC2.  
264 Genes were tested and scored individually using the area under the curve (AUC) as a  
265 combined measure of sensitivity and specificity (**Fig 4d**). We observed that genes such as  
266 *TREM1* (AUC=99%), *CYP26B1* (AUC=97%) and *CXCL8* (AUC=97%) were among the top  
267 markers to distinguish UC1 from UC2. Other genes such as *WNT5*, *BCL2A1*, *C5AR1*, *MMP1*,

268 *MMP3* and *IL11* also presented AUC scores above 90% and also represented good  
269 candidates for UC1 and UC2 distinction in clinical practice.

270

### 271 **UC1 and UC2 respond differently to biological therapies**

272 While we stratified UC patients into two molecularly distinct subgroups, it was unclear whether  
273 UC1 and UC2 show different treatment responses to biological therapies. To address this, we  
274 used the patient-specific treatment response obtained 4 to 8 weeks after the biopsy was  
275 taken and treatment with IFX started (**Table 1**). Interestingly, we observed that on average,  
276 70% of the patients belonging to the subtype UC2 responded to infliximab therapy (**Fig 5a**) in  
277 contrast to less than 10% of the patients classified as UC1, regardless of the dataset  
278 analyzed (**Fig 5a**).

279 To extend the applicability of our findings, we made use of another set of UC patients  
280 receiving vedolizumab and repeated the same procedure as before (**Table 1**). Transcriptomic  
281 data from UC patients were analyzed using the most relevant genes identified in our mouse  
282 colitis model and then clustered as described above to reveal UC1 and UC2. Between them,  
283 UC1 presented a higher expression of the conserved inflammatory genes (**Fig 5b**). We  
284 observed that about 60% of the patients belonging to the UC2 subgroup responded to VDZ, in  
285 comparison to about 13% of the patients belonging to the UC1 subgroup (**Fig 5c**). Taken  
286 together, the data indicates that patients belonging to the UC2 subgroup, which present a  
287 higher percentage of response, respond to either IFX or VDZ treatment. Importantly, our  
288 approach actually allows a more accurate identification of those patients with UC1, in which  
289 87% of the patients are refractory to both IFX and VDZ.

290

### 291 **Discussion**

292 A systematic study demonstrated that biopsy sampling was the major source of inter-patient  
293 variability<sup>22</sup>. Therefore, such technical variations can mask real biological differences, even  
294 though UC is known to present a high level of variability in macroscopic and endoscopic

295 scoring among patients<sup>1,2,8</sup>. To solve this, we limited the analysis to the relevant genes for  
296 inflammation including the phases of tissue repair and regeneration. By using the key DEGs  
297 obtained by a mouse model of colitis, we were able to “ignore” genes that were highly variable  
298 between patients (e.g. as a result of technical variation), and focus only on those that  
299 contribute to inflammation. This allowed us to temporally classify IBD risk genes and  
300 molecularly sub-classify UC patients into two subgroups; one of these characterized by genes  
301 involved in neutrophil recruitment, activation and degranulation, and by low response to  
302 biologicals.

303 Different experimental models to study mucosal immune processes associated with the  
304 pathogenesis of UC are available<sup>33,34</sup>. Among them, the DSS-induced colitis model is broadly  
305 used due to its simplicity and applicability with different therapeutic drugs<sup>35</sup>. Early studies  
306 characterized the temporal changes by qPCR for a handful of inflammatory markers<sup>36</sup>, but  
307 how non-inflammatory (i.e. repair-related) genes fluctuate over time during tissue repair was  
308 unknown. Others had previously performed a kinetic microarray analysis only during the acute  
309 inflammation phase of DSS (from days 0 to 6)<sup>37</sup>, but whether those genes continue to be  
310 expressed during tissue repair remained unclear. Moreover, although the DSS-induced colitis  
311 model has been extensively used for the study of UC, an open reference for gene expression  
312 during intestinal inflammation and tissue repair was still missing. Here, we used a time-series  
313 transcriptional characterization of colitis, which allowed us to identify which genes contribute  
314 to most of the nuances of inflammation over time. In addition, this manuscript provides an  
315 open data source that can be further investigated by others with different questions. As an  
316 example, we provided a temporal assignment of IBD risk genes that might offer insight into  
317 their potential functions. Finally, our data show that the DSS mouse model is a relevant model  
318 for studying certain aspects of human UC.

319 Previous studies identified the molecular differences among responder and non-responder  
320 IBD patients<sup>13</sup>. These studies were purposely biased by an *a priori* knowledge of the  
321 responder and non-responder IBD samples. In contrast, we successfully classified the  
322 patients using a completely unsupervised approach and therefore, we have potentially  
323 identified genes that go beyond the responsiveness to the therapy by describing the

324 molecular signature of the identified subgroups. We were able to do this by using the key  
325 DEGs found in the mouse model of colitis, by “debiasing” the human analysis, by “ignoring”  
326 genes that were highly variable between patients, and by focusing only on those genes that  
327 contribute to inflammation. Consequently, we identified two subpopulations of UC patients  
328 (UC1 and UC2).

329 While per definition both UC1 and UC2 subpopulations are considered inflamed, only UC1  
330 patients present higher expression of genes associated with neutrophil degranulation and  
331 cytokine signaling, and only 10% of these patients responded to biological therapies. Similar  
332 to our results, others have shown that IL6, IL11, IL13RA, STC1 and PTGS2 were down-  
333 regulated in patients responsive to IFX<sup>13</sup> (namely UC2 in our study). Another recent report  
334 showed that the gene OSM is up-regulated in IBD patients compared to healthy controls and  
335 is predictive of anti-TNF responsiveness<sup>38</sup>. However, we did not find OSM as differentially  
336 expressed between UC1 and UC2 patients. For VDZ, however, a signature for prediction of  
337 response to therapy was still missing<sup>15</sup>.

338 The identification of UC2 which is characterized by responsiveness to both IFX and VDZ may  
339 have direct implications in the clinical setting. For example, it indicates that UC2 patients  
340 would benefit from a treatment with IFX only, since IFX therapy has a higher response rate<sup>6</sup>  
341 and is more cost-effective compared to VDZ<sup>39</sup>. On the other hand, identification of non-  
342 responsiveness to both IFX and VDZ in the UC1 patient subgroup, suggests that another line  
343 of therapy should be applied. For example, we observed that the B cell activation factor  
344 (*TNFSF13B*, protein BAFF) was to be found up-regulated in UC1 patients. This suggests a  
345 potential role of B cells in UC1. Moreover, B cells are known to enhance inflammatory  
346 responses by cytokine secretion such as TNF and IL-6<sup>40</sup>, which are also up-regulated in UC1  
347 patients. B cell depletion using anti-CD20 antibody in a small cohort showed a trend in  
348 reducing inflammation, although non-significant<sup>41</sup>. However, it remains possible that B cell  
349 depletion might affect only UC1 patients, but not UC2. Similarly, we also observed that UC1  
350 patients have a higher expression of genes involved in the JAK/STAT signaling pathway  
351 (*PTP4A3*, *SOCS3*) and cytokine signaling (*IL6* and *IL1B*), suggesting a potential role of other

352 therapies for this subgroup, such as canakinumab (anti IL-6 mAb), siltuximab (anti IL-1 $\beta$   
353 mAb), JMS-053 (PTP4A3 inhibitor) and others might apply.

354 In summary, we have performed an unbiased characterization of the inflammatory and tissue  
355 repair processes using a mouse colitis model, providing a useful resource for understanding  
356 colonic inflammation. Many of the genes identified in mice were also detected in human UC  
357 patients, thus allowing us to explore the temporal expression of IBD risk genes during the  
358 course of inflammation and gain useful insights into their potential function. Furthermore, they  
359 allowed us to identify for the first time two clinically relevant molecular ulcerative colitis  
360 subsets (UC1 and UC2) in an unsupervised manner. Thus, our methodology identified two  
361 molecularly distinct UC subgroups and will serve as a proof of concept for the use of  
362 transcriptomic data from highly controlled mice experiments to perform unsupervised and  
363 biologically-driven analysis of highly variable human datasets.

364

## 365 **Methods**

366 All methods used in this paper are described in the Online Methods linked to this manuscript.

367

## 368 **Acknowledgements**

369 We would like to thank Stefan Bonn, Samuel Huber and Charlotte Hedin for critical reading  
370 and suggestions on the manuscript. We thank Elaine Hussey for editorial assistance. EJV  
371 was supported by grants from the Swedish Research Council VR grant K2015-68X-22765-01-  
372 6, Formas grant nr. FR-2016/0005 and Wallenberg Academy Fellow (WAF) program.

373

## 374 **Author Contributions**

375 PC and EJV conceived the idea and wrote the paper. PC performed bioinformatics analysis  
376 and schematic illustrations. NG and EJV provided reagents and guidance. PC, SMP, SD, CS

377 and OED performed the experiments. PC, NG and EJV analyzed and interpreted the data. All  
378 authors contributed to manuscript writing.



## 379 References

- 380 1 Magro, F. *et al.* Third European Evidence-based Consensus on Diagnosis and  
381 Management of Ulcerative Colitis. Part 1: Definitions, Diagnosis, Extra-intestinal  
382 Manifestations, Pregnancy, Cancer Surveillance, Surgery, and Ileo-anal Pouch  
383 Disorders. *Journal of Crohn's & colitis* **11**, 649-670, doi:10.1093/ecco-jcc/jjx008  
384 (2017).
- 385 2 Satsangi, J., Silverberg, M. S., Vermeire, S. & Colombel, J. F. The Montreal  
386 classification of inflammatory bowel disease: controversies, consensus, and  
387 implications. *Gut* **55**, 749-753, doi:10.1136/gut.2005.082909 (2006).
- 388 3 Danese, S. New therapies for inflammatory bowel disease: from the bench to the  
389 bedside. *Gut* **61**, 918-932, doi:10.1136/gutjnl-2011-300904 (2012).
- 390 4 Rutgeerts, P. *et al.* Infliximab for induction and maintenance therapy for ulcerative  
391 colitis. *The New England journal of medicine* **353**, 2462-2476,  
392 doi:10.1056/NEJMoa050516 (2005).
- 393 5 Feagan, B. G. *et al.* Vedolizumab as induction and maintenance therapy for ulcerative  
394 colitis. *The New England journal of medicine* **369**, 699-710,  
395 doi:10.1056/NEJMoa1215734 (2013).
- 396 6 Paramsothy, S., Rosenstein, A. K., Mehandru, S. & Colombel, J. F. The current state  
397 of the art for biological therapies and new small molecules in inflammatory bowel  
398 disease. *Mucosal immunology*, doi:10.1038/s41385-018-0050-3 (2018).
- 399 7 Ordas, I., Eckmann, L., Talamini, M., Baumgart, D. C. & Sandborn, W. J. Ulcerative  
400 colitis. *Lancet* **380**, 1606-1619, doi:10.1016/S0140-6736(12)60150-0 (2012).
- 401 8 Harbord, M. *et al.* Third European Evidence-based Consensus on Diagnosis and  
402 Management of Ulcerative Colitis. Part 2: Current Management. *Journal of Crohn's &*  
403 *colitis* **11**, 769-784, doi:10.1093/ecco-jcc/jjx009 (2017).
- 404 9 Graham, D. B. & Xavier, R. J. From genetics of inflammatory bowel disease towards  
405 mechanistic insights. *Trends in immunology* **34**, 371-378, doi:10.1016/j.it.2013.04.001  
406 (2013).
- 407 10 Huang, H. *et al.* Fine-mapping inflammatory bowel disease loci to single-variant  
408 resolution. *Nature* **547**, 173-178, doi:10.1038/nature22969 (2017).
- 409 11 D'Haens, G. R. *et al.* The London Position Statement of the World Congress of  
410 Gastroenterology on Biological Therapy for IBD with the European Crohn's and Colitis  
411 Organization: when to start, when to stop, which drug to choose, and how to predict  
412 response? *The American journal of gastroenterology* **106**, 199-212; quiz 213,  
413 doi:10.1038/ajg.2010.392 (2011).
- 414 12 Arijis, I. *et al.* Mucosal gene expression of antimicrobial peptides in inflammatory  
415 bowel disease before and after first infliximab treatment. *PloS one* **4**, e7984,  
416 doi:10.1371/journal.pone.0007984 (2009).
- 417 13 Arijis, I. *et al.* Mucosal gene signatures to predict response to infliximab in patients  
418 with ulcerative colitis. *Gut* **58**, 1612-1619, doi:10.1136/gut.2009.178665 (2009).
- 419 14 Toedter, G. *et al.* Gene expression profiling and response signatures associated with  
420 differential responses to infliximab treatment in ulcerative colitis. *The American*  
421 *journal of gastroenterology* **106**, 1272-1280, doi:10.1038/ajg.2011.83 (2011).
- 422 15 Arijis, I. *et al.* Effect of vedolizumab (anti- $\alpha$ 4 $\beta$ 7-integrin) therapy on histological  
423 healing and mucosal gene expression in patients with UC. *Gut* **67**, 43-52,  
424 doi:10.1136/gutjnl-2016-312293 (2016).
- 425 16 Bezdek, J. C. & Hathaway, R. J. VAT: a tool for visual assessment of (cluster)  
426 tendency. 2225-2230, doi:10.1109/ijcnn.2002.1007487 (2002).

- 427 17 Ronan, T., Qi, Z. & Naegle, K. M. Avoiding common pitfalls when clustering biological  
428 data. *Science signaling* **9**, re6, doi:10.1126/scisignal.aad1932 (2016).
- 429 18 D'Haeseleer, P. How does gene expression clustering work? *Nature biotechnology*  
430 **23**, 1499-1501, doi:10.1038/nbt1205-1499 (2005).
- 431 19 Adolfson, A. A., M.; Brownstain, N. C. *To Cluster, or Not to Cluster: How to Answer*  
432 *the Question* (2017).
- 433 20 Hartigan, J. A. & Hartigan, P. M. The Dip Test of Unimodality. *The Annals of Statistics*  
434 **13**, 70-84, doi:10.1214/aos/1176346577 (1985).
- 435 21 Suzuki, R. & Shimodaira, H. Pvcust: an R package for assessing the uncertainty in  
436 hierarchical clustering. *Bioinformatics* **22**, 1540-1542,  
437 doi:10.1093/bioinformatics/btl117 (2006).
- 438 22 Bakay, M. *et al.* Sources of variability and effect of experimental approach on  
439 expression profiling data interpretation. *BMC bioinformatics* **3**, 4 (2002).
- 440 23 McIntyre, L. M. *et al.* RNA-seq: technical variability and sampling. *BMC genomics* **12**,  
441 293, doi:10.1186/1471-2164-12-293 (2011).
- 442 24 Eichele, D. D. & Kharbanda, K. K. Dextran sodium sulfate colitis murine model: An  
443 indispensable tool for advancing our understanding of inflammatory bowel diseases  
444 pathogenesis. *World journal of gastroenterology* **23**, 6016-6029,  
445 doi:10.3748/wjg.v23.i33.6016 (2017).
- 446 25 McCarthy, D. J., Chen, Y. & Smyth, G. K. Differential expression analysis of  
447 multifactor RNA-Seq experiments with respect to biological variation. *Nucleic acids*  
448 *research* **40**, 4288-4297, doi:10.1093/nar/gks042 (2012).
- 449 26 Taman, H. *et al.* Transcriptomic Landscape of Treatment-Naive Ulcerative Colitis.  
450 *Journal of Crohn's & colitis* **12**, 327-336, doi:10.1093/ecco-jcc/jjx139 (2018).
- 451 27 Lamas, B. *et al.* CARD9 impacts colitis by altering gut microbiota metabolism of  
452 tryptophan into aryl hydrocarbon receptor ligands. *Nature medicine* **22**, 598-605,  
453 doi:10.1038/nm.4102 (2016).
- 454 28 Ito, R. *et al.* Interferon-gamma is causatively involved in experimental inflammatory  
455 bowel disease in mice. *Clinical and experimental immunology* **146**, 330-338,  
456 doi:10.1111/j.1365-2249.2006.03214.x (2006).
- 457 29 Kobayashi, T. *et al.* NFIL3-deficient mice develop microbiota-dependent, IL-12/23-  
458 driven spontaneous colitis. *Journal of immunology* **192**, 1918-1927,  
459 doi:10.4049/jimmunol.1301819 (2014).
- 460 30 Xu, J. *et al.* Stat4 is critical for the balance between Th17 cells and regulatory T cells  
461 in colitis. *Journal of immunology* **186**, 6597-6606, doi:10.4049/jimmunol.1004074  
462 (2011).
- 463 31 Liu, J. *et al.* Chronic inflammation up-regulates P-gp in peripheral mononuclear blood  
464 cells via the STAT3/Nf-kappab pathway in 2,4,6-trinitrobenzene sulfonic acid-induced  
465 colitis mice. *Scientific reports* **5**, 13558, doi:10.1038/srep13558 (2015).
- 466 32 Borchering, F. *et al.* The CD40-CD40L pathway contributes to the proinflammatory  
467 function of intestinal epithelial cells in inflammatory bowel disease. *The American*  
468 *journal of pathology* **176**, 1816-1827, doi:10.2353/ajpath.2010.090461 (2010).
- 469 33 Kiesler, P., Fuss, I. J. & Strober, W. Experimental Models of Inflammatory Bowel  
470 Diseases. *Cellular and molecular gastroenterology and hepatology* **1**, 154-170,  
471 doi:10.1016/j.jcmgh.2015.01.006 (2015).
- 472 34 Wirtz, S. *et al.* Chemically induced mouse models of acute and chronic intestinal  
473 inflammation. *Nature protocols* **12**, 1295-1309, doi:10.1038/nprot.2017.044 (2017).

- 474 35 Melgar, S. *et al.* Validation of murine dextran sulfate sodium-induced colitis using four  
475 therapeutic agents for human inflammatory bowel disease. *International*  
476 *immunopharmacology* **8**, 836-844, doi:10.1016/j.intimp.2008.01.036 (2008).
- 477 36 Yan, Y. *et al.* Temporal and spatial analysis of clinical and molecular parameters in  
478 dextran sodium sulfate induced colitis. *PloS one* **4**, e6073,  
479 doi:10.1371/journal.pone.0006073 (2009).
- 480 37 Fang, K. *et al.* Temporal genomewide expression profiling of DSS colitis reveals  
481 novel inflammatory and angiogenesis genes similar to ulcerative colitis. *Physiological*  
482 *genomics* **43**, 43-56, doi:10.1152/physiolgenomics.00138.2010 (2011).
- 483 38 West, N. R. *et al.* Oncostatin M drives intestinal inflammation and predicts response  
484 to tumor necrosis factor-neutralizing therapy in patients with inflammatory bowel  
485 disease. *Nature medicine* **23**, 579-589, doi:10.1038/nm.4307 (2017).
- 486 39 Yokomizo, L., Limketkai, B. & Park, K. T. Cost-effectiveness of adalimumab,  
487 infliximab or vedolizumab as first-line biological therapy in moderate-to-severe  
488 ulcerative colitis. *BMJ open gastroenterology* **3**, e000093, doi:10.1136/bmjgast-2016-  
489 000093 (2016).
- 490 40 Shen, P. & Fillatreau, S. Antibody-independent functions of B cells: a focus on  
491 cytokines. *Nature reviews. Immunology* **15**, 441-451, doi:10.1038/nri3857 (2015).
- 492 41 Leiper, K. *et al.* Randomised placebo-controlled trial of rituximab (anti-CD20) in active  
493 ulcerative colitis. *Gut* **60**, 1520-1526, doi:10.1136/gut.2010.225482 (2011).

494

495

496

## 497 **Figure legends**

498 **Figure 1. Human ulcerative colitis transcriptional profiles cluster patients into**  
499 **molecular subgroups. (a)** Schematic representation of the strategy used for patient group  
500 identification, in which four publicly available datasets were combined. Gene ranking was  
501 done using the most variable genes in the human dataset, which were used for clustering  
502 analysis. **(b)** Sample dissimilarity heatmaps for visual analysis of clustering tendency (VAT),  
503 comparing the human dataset using the top 100 variable genes. **(c)** tSNE plot using the top  
504 100 variable genes in the human dataset. Each point represents a patient sample. **(d)**  
505 Hartigan's Dip test for clustering tendency using all genes in the dataset, the top 100 variable  
506 genes, the top 100 highly dispersed genes or the top 100 leading genes in the principal  
507 components. **(e)** Bootstrapping analysis of hierarchical clustering, comparing the human  
508 dataset using the top 100 variable genes in the human dataset. Numbers in orange indicate  
509 the approximately unbiased (AU) p-value, shown as a percentage. AU closer to zero indicates  
510 a cluster with low stability.

511

512 **Figure 2. Unbiased characterization of the DSS colitis reveals conserved inflammatory**  
513 **signature between mice and humans. (a)** Schematic illustration of the experimental design.  
514 Mice received DSS in drinking water for 7 days, after which the treatment was replaced with  
515 water. Samples were collected at indicated time points. **(b)** PCA on differentially expressed  
516 gene counts. Samples were color-coded according to their respective day of collection (from  
517 grey to orange to blue). The percentage of variance explained by the respective principal  
518 component indicated in parenthesis. **(c)** Clustered heatmap of all differentially expressed  
519 genes (left). The mean expression of each gene module is shown (right). Functional  
520 annotation of genes in each cluster was done based on Gene Ontology (GO) enrichment.  
521 Only the top 3 enriched processes are shown, sorted by P-value. **(d)** Venn diagram  
522 comparing the list of DEGs in treatment-naive UC and the DEGs identified in mouse DSS  
523 colitis (upper). Among the 650 genes shared among those lists (in red), the number and  
524 percentage of genes found in each module identified in our mouse dataset (lower). Modules

525 highlighted in bold are the ones enriched for inflammatory terms in **Fig 2c**. **(e)** GO and KEGG  
526 enrichment analysis out of the 650 shared genes identified in **(d)**, sorted by P-value.

527

528 **Figure 3. Conserved inflammatory gene signature distinguishes two UC subgroups. (a)**

529 Schematic representation of the strategy used for patient group identification. Four publicly  
530 available datasets were combined. Gene ranking was done using the most variable genes  
531 identified mouse dataset that had a homolog in humans. **(b)** Sample dissimilarity heatmaps  
532 for visual analysis of clustering tendency (VAT), comparing the human dataset using the top  
533 mouse gene homologs. **(c)** Hartigan's Dip test for clustering tendency comparing the analysis  
534 using top 100 variable genes and the top mouse gene homologs. **(d)** Bootstrapping analysis  
535 of hierarchical clustering, comparing the human dataset using the top mouse gene homologs.  
536 Numbers in orange indicate the approximately unbiased (AU) p-value, shown as percentage.  
537 AU closer to zero indicates a cluster with low stability. **(e)** tSNE plot using the top variable  
538 genes identified from the mouse dataset. Each point represents a patient sample. tSNE plot  
539 showing the separation of 2 patient subgroups (left). Unsupervised hierarchical agglomerative  
540 clustering was used to automatically define patient subdivision (center). Dashed line delimits  
541 UC1 (triangle) and UC2 (circles) patients. **(f)** Average expression of mouse homolog genes  
542 used to subdivide patients (right), where dark blue colour indicates higher average  
543 expression. Dashed line delimits UC1 (triangle) and UC2 (circles) patients. **(g)** Assessment of  
544 Mayo clinical subscore in patients from UC1 and UC2. Mann-Whitney test was used for  
545 comparison.

546

547 **Figure 4. UC1 subgroup is enriched for the inflammatory signature. (a)** Heatmap of

548 DEGs between UC1 and UC2 patients including all genes in the human dataset. Only the  
549 selected genes are shown, grouped by functional categories and respective to the expression  
550 level. **(b)** tSNE overlay of the expression level of selected DEGs between UC1 and UC2,  
551 showing inter-patient variation. **(c)** Venn diagram of the top GO, KEGG and cell enriched  
552 terms identified from the DEGs between UC1 and UC2. **(d)** Top 20 genes ranked by area

553 under the curve (AUC) for specificity and sensitivity to distinguish UC1 from UC2, among the  
554 list of DEGs (left). Classification was carried out using logistic regression. The fitted values of  
555 prediction are shown for selected genes (right).

556

557 **Figure 5. UC1 and UC2 differ on their repose to IFX and VDZ therapy.** (a) Individual  
558 patient response to IFX therapy in each group and the percentage of patients responding to  
559 IFX in each cohort. (b) tSNE plot using the top variable genes identified from the mouse  
560 dataset. Average expression of mouse homolog genes used to subdivide patients (left),  
561 where dark blue colour indicates higher average expression. Unsupervised hierarchical  
562 agglomerative clustering was used to automatically define patient subdivision (right). Dashed  
563 line delimits UC1 (triangle) and UC2 (circles) patients. (c) Individual patient response to VDZ  
564 therapy in each group and the percentage of patients responding to VDZ in the cohort (right).

565

## 566 **Supplementary figure legends**

567 **Figure S1. Normalization of publicly available ulcerative colitis datasets.** (a)  
568 Multidimensional scaling plots before and after batch effect correction using ComBat. (b)  
569 Relative log expression plots comparing samples from the different datasets before and after  
570 adjusting for batches using ComBat.

571

572 **Figure S2. Macroscopic alterations in mice during DSS-induced colitis.** (a) Body weight  
573 change over the time course of colitis. \* $P < 0.05$ ; two-way ANOVA. (b) Disease activity index  
574 score (DAI) over time (in arbitrary units, A.U.). \* $P < 0.05$ ; two-way ANOVA. (c) Representative  
575 histological section of the colonic tissue at indicated time points. H&E (upper) and  
576 immunohistochemistry staining for Ki-67 (bottom) are depicted. One representative figure out  
577 of three experiments. Scale bar 50  $\mu\text{m}$ .

578 (d) Flow cytometry data showing colonic epithelial cell (EpCAM<sup>+</sup>CD45<sup>-</sup>) frequencies during the  
579 course of the experiment. Dot plots are representative of three experiments. The graph on the

580 right shows epithelial cell absolute numbers during the course of the experiment. \* $p < 0.05$ ;  
581 two-way ANOVA. (e) Quantification of intestinal permeability by FITC-dextran assay. Mice  
582 were gavaged with 10 mg/mL of FITC-dextran and sacrificed 4 hours later for quantification of  
583 fluorescence in the serum. \* $p < 0.05$ ; two-way ANOVA. Error bars represent SEM.

584

585 **Figure S3. Identification of top leading genes and that drive overall differences in gene**  
586 **expression during DSS colitis.** (a) Percentage of variance explained by each principal  
587 component (see Fig 2b). (b) Overall fluctuations in the first 6 PCs over the time course of DSS  
588 colitis. Note that the overall variance captured by PC6 is close to 0 and therefore not used in  
589 further analysis. (c) Ranking of the top 20 leading genes that contribute to the variance in  
590 each of the first 5 PCs.

591

592 **Figure S4. List of the top DEGs per module.** (a) Down-regulated gene modules m8, m7  
593 and m2 (see Fig 2c). (b) Up-regulated gene modules m9, m1, m3, m4, m5 and m6 (see Fig  
594 2c).

595

596 **Figure S5. Mouse colitis and human UC share inflammatory pathways and IBD risk**  
597 **genes.** (a) Venn diagram comparing IBD risk genes and the list of DEGs in the mouse  
598 dataset (upper). 75 genes are shared between these lists (in red). The number and  
599 percentage out of the 75 IBD-risk genes presented in each mouse module is shown (below).  
600 Modules highlighted in bold are the ones enriched for inflammatory terms in **Fig 2c**. (b) Venn  
601 diagram for the genes in the list of DEGs in the mouse dataset, genes associated with UC  
602 and/or to CD. Among those, 26 are shared between UC and CD (in red). (c) Expression level  
603 of IBD risk gene mouse homologs during the DSS colitis.

604

605 **Figure S6. List of highly variable genes in humans and mouse colitis.** (a) Top 100 genes  
606 sorted by high variance in the human dataset. Genes highlighted in red are also present

607 among the top list of homolog genes identified in the mouse colitis dataset. **(b)** Top list of  
608 homolog genes identified in the mouse colitis dataset, sorted by variance on the human  
609 dataset.

610

611 **Figure S7. List of DEGs between UC1 and UC2 and enrichment analysis.** **(a)** List of the  
612 top 32 up-regulated and 16 down-regulated DEGs between UC1 and UC2. **(b)** Cell, GO and  
613 KEGG enrichment analysis for the genes up-regulated in UC1 compared to UC2.

614

## 615 **Tables**

Table 1. Publicly available human datasets used for classification of ulcerative colitis subtypes. Only the number of patients used for analysis are shown (inflamed mucosa before receiving any therapy).

| Dataset ID         | Total | Resp | Non-resp | Ref. |
|--------------------|-------|------|----------|------|
| <b>Infliximab</b>  |       |      |          |      |
| GSE12251           | 23    | 11   | 12       | 13   |
| GSE73661           | 23    | 15   | 8        | 15   |
| GSE23597           | 32    | 7    | 25       | 14   |
| GSE16879           | 24    | 16   | 8        | 12   |
| Sum                | 102   | 49   | 53       |      |
| <b>Vedolizumab</b> |       |      |          |      |
| GSE73661           | 37    | 23   | 14       | 15   |

616



## 21 **Online Methods**

22

### 23 **1.1. Mice and induction of DSS colitis**

24 Female 8-12 weeks old C57BL/6J mice were obtained from ScanBur (Charles River,  
25 Germany) and housed in environmentally enriched ventilated cages under specific pathogen  
26 free conditions (SPF) at Astrid Fagræus laboratory (AFL, Karolinska Institutet) under 12h light  
27 cycle and receiving water and ration *ad libitum* (RM1(P), Special Diet Services). For induction  
28 of colitis, 2.5% w/v dextran sulfate sodium (DSS; Affymetrics) was supplemented in drinking  
29 water and given to mice for 7 consecutive days, with a change on day 3. After the treatment  
30 was ceased, mice returned to receive standard water. Mice were monitored everyday for  
31 alterations in body weight, disease activity index (DAI) <sup>1</sup>. Mice were anesthetized with  
32 isoflurane and sacrificed for blood and tissue sampling. Animal experiments were done  
33 following institutional guidelines of the Stockholm Regional Ethics Committee under approved  
34 ethical permit number N89/15.

35

### 36 **1.2. Mouse gene expression by mRNA sequencing**

37 Colon samples were stored in RNAlater (Ambion) at -80°C until further use. Colonic samples  
38 were homogenized using bead-beating system (Precellys) for total RNA purification using  
39 RNeasy kit (Qiagen) following manufacturers recommendations. RNA purity and quantity  
40 was measured by NanoDrop spectrophotometer (ThermoFisher). All samples were screened  
41 for RNA integrity check and presented RIN values above 8 on 2100 Bioanalyzer instrument  
42 (Agilent). Samples were submitted to Novogene for library preparation using TruSeq Stranded  
43 mRNA Library Prep Kit (poly-A selection) and sequencing using HiSeq-2500 platform  
44 (Illumina). Samples were sequenced using single-end 50bp sequencing<sup>2</sup>, aiming an coverage  
45 of 20M reads. Read quality was inspected using MultiQC<sup>3</sup>, trimmed with Trimmomatic<sup>4</sup> and  
46 further proceeded for abundance estimation using Kallisto<sup>5</sup>.

47 Further data analysis was done in R programming language (Rstudio). Genes with absolute  
48 read count less than 5 in at least 3 samples were considered with low expression and filtered  
49 out. Differences in tissue cell composition that could affect transcriptional pools were  
50 balanced by means of removing unwanted variation based on negative control genes using  
51 the RUVg function implemented in RUVseq package<sup>6</sup>. Analysis revealed that library sizes  
52 strongly correlated with several known intestinal housekeeping genes, such as *Hprt* ( $r=0.87$ )  
53 and *Gapdh* ( $r=0.85$ ), but not *Actb* ( $r=0.68$ ). Moreover, genes such as *Cd63* (0.94), *Trappc*  
54 ( $r=0.97$ ), and *Cpped1* (0.97) and *Slc25a3* ( $r=0.96$ ) correlated even more strongly to the library  
55 sizes, indicating potentially novel housekeeping genes during colonic inflammation. Negative  
56 controls genes were thus defined as genes with positive Pearson correlation above 0.9 to  
57 their respective sample library sizes. Estimated unwanted variation vectors were then used as  
58 covariates for calculation of differentially expressed genes (DEGs) using EdgeR package<sup>7</sup>.  
59 EdgeR is specialized in performing time-series differential expression by means of  
60 generalized linear model (glm) function<sup>8</sup>, where time points were parsed as independent  
61 factors in the contrast matrix, thus allowing detection of differentially expressed genes at any  
62 given time point. Genes were considered differentially expressed when the overall false  
63 discovery rate (FDR) < 0.01 and at least one time-point had fold change > 1.5. DEGs  
64 identified in this manner were used for dimensionality reduction by principal component  
65 analysis (PCA), from which gene-wise contribution to the total variation can be calculated.  
66 Identification of gene modules was done based on smoothed temporal expression curves<sup>9</sup>.  
67 Briefly, gene-wise log fold changes were smoothed using spline curves and further grouped  
68 into modules by using Pearson correlation as distance for hierarchical agglomerative  
69 clustering with Ward's method ("ward.D2"). Functional gene annotation was performed on  
70 each gene module individually using the Gene Ontology (GO\_Biological\_Process\_2017) and  
71 the Kyoto Encyclopedia of Genes and Genomes (KEGG\_2016) libraries with enrichR  
72 package<sup>10</sup>.

73

### 74 **1.3. Mapping treatment-naïve ulcerative colitis and IBD risk genes to the murine**

#### 75 **RNA-seq dataset**

76 To identify which genes are shared between mouse and human ulcerative colitis, we  
77 compared the list of DEGs identified by in the DSS dataset and the list of genes identified by  
78 Taman et al.<sup>11</sup>. Mapping of IBD risk genes was done using the list of IBD risk genes identified  
79 by fine-mapping at the single loci resolution<sup>12</sup>. Identification of enriched GO processes and  
80 KEGG pathways was done using enrichR<sup>10</sup>.

81

### 82 **1.4. Classification of ulcerative colitis molecular subtypes using genes in mouse**

#### 83 **principal components**

84 To investigate whether the nuances of inflammation observed in the mouse model could also  
85 be found in humans, we made use of four human microarray datasets from GSE12251<sup>13</sup>,  
86 GSE73661<sup>14</sup>, GSE23597<sup>15</sup> and GSE16879<sup>16</sup>. Combined, these datasets contain gene  
87 expression and metadata of 447 patients, containing information such as disease type (UC or  
88 CD), Mayo macroscopic score, the therapy given, when the sample was collected and the  
89 response to infliximab (IFX) or to vedolizumab (VDZ). Across all datasets, patients were  
90 considered inflamed if presenting a Mayo score of 2 or 3 (out of 3). Similarly, patient were  
91 considered to respond to therapy when it respective Mayo score reduced to 0 or 1, between  
92 4-8 weeks of treatment with IFX or between 6-52 weeks of treatment with VDZ. For this study,  
93 we included only patients with UC before receiving any therapy (either IFX or VDZ),  
94 comprising a total transcriptional profiles of 143 patients, of which 102 received IFX and 41 for  
95 VDZ. The list of samples used in this study is supplied as metadata table (**Table S9**).

96 Probes with log2 fluorescence count lower than 6 in at least 10 samples were excluded from  
97 the analysis. Batches between dataset were observed and corrected using the ComBat  
98 function in SVA package<sup>17</sup>. Selection of genes for further exploration was done by different  
99 approaches: 1) using all genes; 2) using only the top 100 highly variable genes; 3) using the  
100 genes with top 100 high dispersion; 3) The gene with high loading in principal component 1  
101 and; 4) The gene with high loading in principal component 2.

102 We determined whether clustering patterns exist by 4 independent methods: 1) By  
103 dimensionality reduction using tSNE. Since data originated from biopsies are known to  
104 present high variability across patients<sup>18</sup>, dimensionality reduction and visualization was done  
105 using t-Stochastic neighbor embedding (t-SNE). Because of its nonlinear characteristics, t-  
106 SNE becomes less sensitive to noise and outperform PCA<sup>19</sup> to discriminate biopsies based  
107 on shared expression patterns, rather than their absolute expression values.; 2) By visual  
108 assessment of clustering tendency (VAT) using dissimilarity matrices<sup>20</sup>; 3) By using the  
109 Hartigan's dip test<sup>21,22</sup>, which tests whether the gene distribution are different to an unimodal  
110 distribution. Values close to 1 indicate that the data is unlikely to present cluster  
111 substructures. We performed bootstrapping 100 times on 90% of the samples to calculate  
112 Hartigan's dip test p-value. The comparison between bootstrapping with human highly  
113 variable genes and mouse PCs (see below) was done using paired Mann-Whitney test; 4) By  
114 dividing patients into subgroups using hierarchical agglomerative clustering. Cluster stability  
115 was determined by bootstrapping 300 times on 90% or the samples, resulting in the  
116 approximate unbiased (AU) statistics<sup>23</sup>. Clusters with AU closer to 100 present higher  
117 stability.

118 Instead of using the top variable genes as above, we alternatively used the top genes  
119 identified in the mouse RNA-seq DSS colitis dataset (see above). To this end, the top 100  
120 genes identified in PC1 and PC2 were selected for identification of the respective human  
121 homologs. Together, 175 genes were found in top genes in both PC1 and PC2 and from  
122 these, 148 genes had a homolog in humans. In total, 57 homolog genes were found between  
123 our mouse PCs and the human dataset. Dimensionality reduction was performed with tSNE.  
124 Assessment of clustering tendency was done as described above. Agglomerative clustering  
125 on the Euclidean distance using complete linkage was used to discriminate patient subgroups  
126 UC1 and UC2. For the matter of definition used in this study, patients that present higher  
127 mean expression of the 57 mouse-human homologs were classified as UC1, while those with  
128 low expression were classified as UC2. Differences in expression between UC1 and UC2  
129 were calculated using eBayes method in limma package<sup>24</sup>. Probes with fold changes above

130 1.5 and FDR lower than 0.001 were considered significantly differentially expressed.

131 Identification of enriched GO, KEGG and cell types was done using enrichR<sup>10</sup>.

132 To identify which genes can discern UC1 from UC2, we trained a logistic regression classifier  
133 for each gene individually and comparing to the UC1 and UC2 classification mentioned  
134 above. The sensibility and sensitivity of the prediction was summarized using the area under  
135 the curve (AUC) method. Genes with AUC values closer to 1 (100%) have a better accuracy  
136 to distinguish UC1 and UC2 patients.

137

### 138 **1.5. Lamina propria cell isolation for analysis by flow cytometry**

139 Cell isolation from the colonic tissue was performed as previously described<sup>26</sup> with  
140 modifications. Briefly, tissues were open longitudinally, cut into 1cm pieces and washed with  
141 PBS. The epithelial cell fraction was obtained by incubating the tissue with Buffer-A (PBS, 5%  
142 FCS, 5 mM EDTA) at 37°C for 20 minutes under agitation at 600 rpm. The supernatant was  
143 collected and kept on ice while the remaining tissue was washed 2 times with PBS. Tissue  
144 were digested with collagenase solution containing 0.15 mg/ml Liberase TL (Roche) and  
145 0.1 mg/ml DNase I (Roche) in HBSS and incubated at 37°C for 60 minutes under agitation at  
146 1200 rpm. The digested and the epithelial cell fraction were mixed, filtered through a 100 um  
147 cell strainer, pelleted by centrifugation at 1750 rpm and re-suspended in Buffer-A. Cell  
148 suspensions were blocked with Fc-blocking solution (1:1000, eBioscience) and stained with  
149 the antibody mix (1:200), both at 4° for 15 minutes. The following antibodies were purchased  
150 from BD Biosciences: CD45.2 (104), CD3 (500A2), CD90.2 (53-2.1), EPCAM (G8.8), CD11b  
151 (M1/70), CD11c (N418), Ly6G (1A8), B220 (RA3-6B2) and CD64 (54-5/7.1). The following  
152 antibodies were purchased from eBiosciences: CD103 (2E7) and Ly6C (HK1.4). Counting  
153 beads (Spherotech) and DAPI (1:400, Sigma) were added to each sample to allow absolute  
154 cell quantification and exclusion of dead cells. Data acquisition was done using 5-laser LSR  
155 Fortessa flow cytometer (BD Biosciences) and analysis was carried out with FlowJo software  
156 (TreeStar).

157

158      **1.6. Histological analyses**

159      The colonic tissue was rinsed and flushed with PBS and gently squeezed out to remove non-  
160      adherent bacteria, fixed in 4% formaldehyde solution for 24 h and embedded in paraffin. 5  $\mu$ m  
161      sections were stained with H&E. Ki67 (1:100, Cat# MA5-14520, Thermo Scientific) staining  
162      was performed according to previously published protocol {26364605}. A pathologist  
163      accessed the tissue pathological score in a blind manner and score the sections as previously  
164      described<sup>27</sup>.

165

166      **1.7. FITC-dextran assay**

167      Assessment of epithelial barrier integrity was done as previously described. Mice were  
168      gavaged with 10 mg/mL FITC-dextran (Sigma) at different time points of DSS colitis, but on  
169      the same day of sacrifice. Four hours later, mice were killed and the blood collected for  
170      analysis. Sera were diluted 1:1 v/v in PBS and added to a 96-well plate for fluorescent-based  
171      assays (Invitrogen) and were quantified on a fluorescent plate reader using a 535/587nm  
172      ex/em filter. FITC-dextran concentration was calculated by interpolation to 12-dilution FITC-  
173      dextran standard curve.

174

175      **1.8. Statistical analyses**

176      Statistical analyses were performed using Prism Software 6.0 (GraphPad). Two-sample  
177      comparisons were compared using two-tailed Student's *t*-test. ANOVA with Dunnett's *post-*  
178      *hoc* was used for calculation of significance at multiple time points relative to the control (day  
179      0). Non-continuous data was compared using non-parametric Mann-Whitney U test. Results  
180      were considered significant when  $p < 0.05$ .

181

182      **1.9. Data availability**

183 All the raw data generated in this study will be deposited in a suitable database (i.e., Gene  
184 Expression Omnibus) upon acceptance of this manuscript.

185

186

## 187 References

- 188 1 Kim, J. J., Shajib, M. S., Manocha, M. M. & Khan, W. I. Investigating intestinal inflammation  
189 in DSS-induced model of IBD. *Journal of visualized experiments : JoVE*, doi:10.3791/3678  
190 (2012).
- 191 2 Chhangawala, S., Rudy, G., Mason, C. E. & Rosenfeld, J. A. The impact of read length on  
192 quantification of differentially expressed genes and splice junction detection. *Genome biology*  
193 **16**, 131, doi:10.1186/s13059-015-0697-y (2015).
- 194 3 Ewels, P., Magnusson, M., Lundin, S. & Kaller, M. MultiQC: summarize analysis results for  
195 multiple tools and samples in a single report. *Bioinformatics* **32**, 3047-3048,  
196 doi:10.1093/bioinformatics/btw354 (2016).
- 197 4 Bolger, A. M., Lohse, M. & Usadel, B. Trimmomatic: a flexible trimmer for Illumina  
198 sequence data. *Bioinformatics* **30**, 2114-2120, doi:10.1093/bioinformatics/btu170 (2014).
- 199 5 Bray, N. L., Pimentel, H., Melsted, P. & Pachter, L. Near-optimal probabilistic RNA-seq  
200 quantification. *Nature biotechnology* **34**, 525-527, doi:10.1038/nbt.3519 (2016).
- 201 6 Risso, D., Ngai, J., Speed, T. P. & Dudoit, S. Normalization of RNA-seq data using factor  
202 analysis of control genes or samples. *Nature biotechnology* **32**, 896-902, doi:10.1038/nbt.2931  
203 (2014).
- 204 7 Robinson, M. D., McCarthy, D. J. & Smyth, G. K. edgeR: a Bioconductor package for  
205 differential expression analysis of digital gene expression data. *Bioinformatics* **26**, 139-140,  
206 doi:10.1093/bioinformatics/btp616 (2010).
- 207 8 McCarthy, D. J., Chen, Y. & Smyth, G. K. Differential expression analysis of multifactor  
208 RNA-Seq experiments with respect to biological variation. *Nucleic acids research* **40**, 4288-  
209 4297, doi:10.1093/nar/gks042 (2012).
- 210 9 Bar-Joseph, Z., Gerber, G. K., Gifford, D. K., Jaakkola, T. S. & Simon, I. Continuous  
211 representations of time-series gene expression data. *Journal of computational biology : a*  
212 *journal of computational molecular cell biology* **10**, 341-356,  
213 doi:10.1089/10665270360688057 (2003).
- 214 10 Kuleshov, M. V. *et al.* Enrichr: a comprehensive gene set enrichment analysis web server  
215 2016 update. *Nucleic acids research* **44**, W90-97, doi:10.1093/nar/gkw377 (2016).
- 216 11 Taman, H. *et al.* Transcriptomic Landscape of Treatment-Naive Ulcerative Colitis. *Journal of*  
217 *Crohn's & colitis* **12**, 327-336, doi:10.1093/ecco-jcc/jjx139 (2018).
- 218 12 Huang, H. *et al.* Fine-mapping inflammatory bowel disease loci to single-variant resolution.  
219 *Nature* **547**, 173-178, doi:10.1038/nature22969 (2017).
- 220 13 Arijs, I. *et al.* Mucosal gene signatures to predict response to infliximab in patients with  
221 ulcerative colitis. *Gut* **58**, 1612-1619, doi:10.1136/gut.2009.178665 (2009).
- 222 14 Arijs, I. *et al.* Effect of vedolizumab (anti-alpha4beta7-integrin) therapy on histological  
223 healing and mucosal gene expression in patients with UC. *Gut* **67**, 43-52, doi:10.1136/gutjnl-  
224 2016-312293 (2016).
- 225 15 Arijs, I. *et al.* Mucosal gene expression of antimicrobial peptides in inflammatory bowel  
226 disease before and after first infliximab treatment. *PloS one* **4**, e7984,  
227 doi:10.1371/journal.pone.0007984 (2009).

- 228 16 Toedter, G. *et al.* Gene expression profiling and response signatures associated with  
229 differential responses to infliximab treatment in ulcerative colitis. *The American journal of*  
230 *gastroenterology* **106**, 1272-1280, doi:10.1038/ajg.2011.83 (2011).
- 231 17 Leek, J. T., Johnson, W. E., Parker, H. S., Jaffe, A. E. & Storey, J. D. The sva package for  
232 removing batch effects and other unwanted variation in high-throughput experiments.  
233 *Bioinformatics* **28**, 882-883, doi:10.1093/bioinformatics/bts034 (2012).
- 234 18 Bakay, M. *et al.* Sources of variability and effect of experimental approach on expression  
235 profiling data interpretation. *BMC bioinformatics* **3**, 4 (2002).
- 236 19 Bartenhagen, C., Klein, H. U., Ruckert, C., Jiang, X. & Dugas, M. Comparative study of  
237 unsupervised dimension reduction techniques for the visualization of microarray gene  
238 expression data. *BMC bioinformatics* **11**, 567, doi:10.1186/1471-2105-11-567 (2010).
- 239 20 Bezdek, J. C. & Hathaway, R. J. VAT: a tool for visual assessment of (cluster) tendency.  
240 2225-2230, doi:10.1109/ijcnn.2002.1007487 (2002).
- 241 21 Adolphson, A. A., M.; Brownstain, N. C. *To Cluster, or Not to Cluster: How to Answer the*  
242 *Question* (2017).
- 243 22 Hartigan, J. A. & Hartigan, P. M. The Dip Test of Unimodality. *The Annals of Statistics* **13**,  
244 70-84, doi:10.1214/aos/1176346577 (1985).
- 245 23 Suzuki, R. & Shimodaira, H. Pvclust: an R package for assessing the uncertainty in  
246 hierarchical clustering. *Bioinformatics* **22**, 1540-1542, doi:10.1093/bioinformatics/btl117  
247 (2006).
- 248 24 Smyth, G. K. Linear models and empirical bayes methods for assessing differential expression  
249 in microarray experiments. *Statistical applications in genetics and molecular biology* **3**,  
250 Article3, doi:10.2202/1544-6115.1027 (2004).
- 251 25 Livak, K. J. & Schmittgen, T. D. Analysis of relative gene expression data using real-time  
252 quantitative PCR and the 2(-Delta Delta C(T)) Method. *Methods* **25**, 402-408,  
253 doi:10.1006/meth.2001.1262 (2001).
- 254 26 Parigi, S. M. *et al.* Flt3 ligand expands bona fide innate lymphoid cell precursors in vivo.  
255 *Scientific reports* **8**, 154, doi:10.1038/s41598-017-18283-0 (2018).
- 256 27 Erben, U. *et al.* A guide to histomorphological evaluation of intestinal inflammation in mouse  
257 models. *International journal of clinical and experimental pathology* **7**, 4557-4576 (2014).
- 258



Figure 1

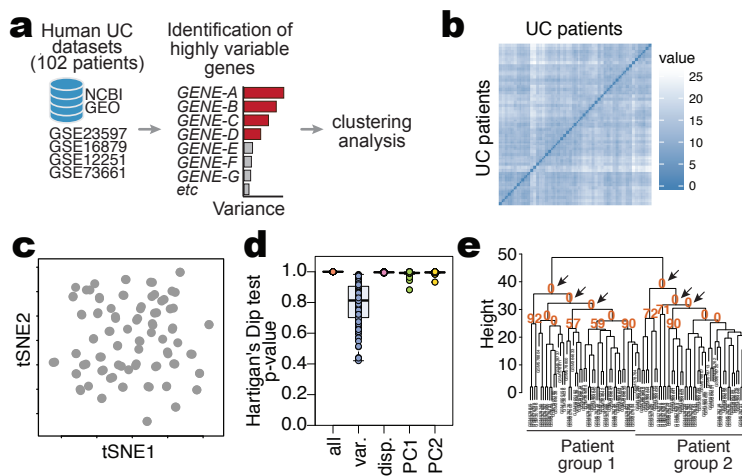

# Figure 2

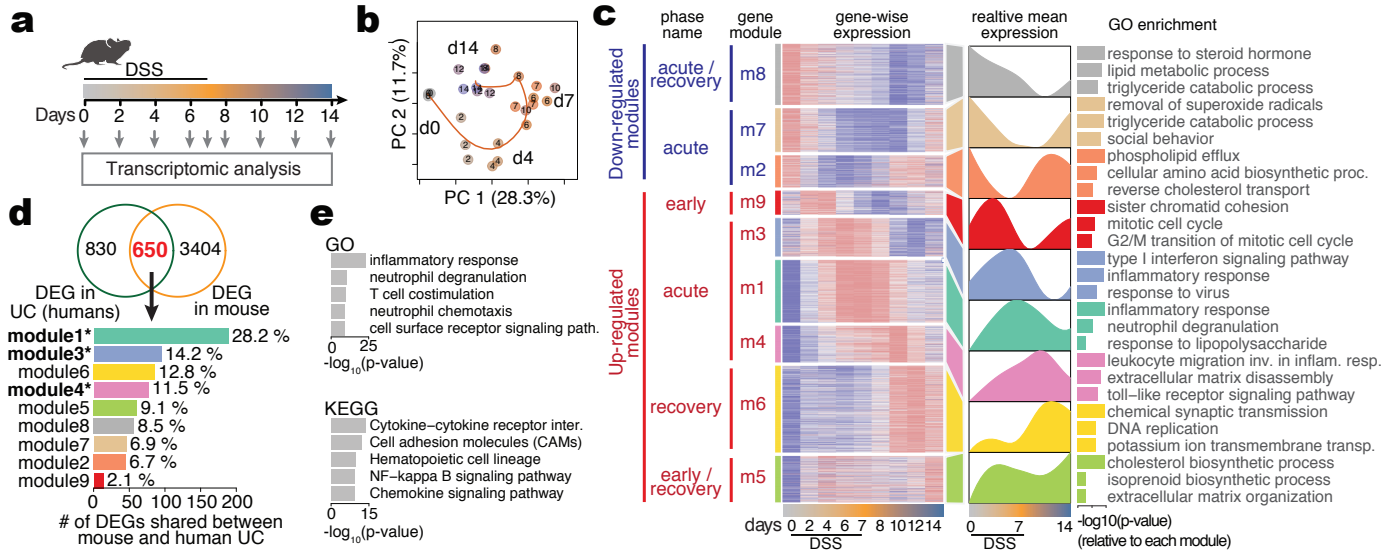

Figure 3

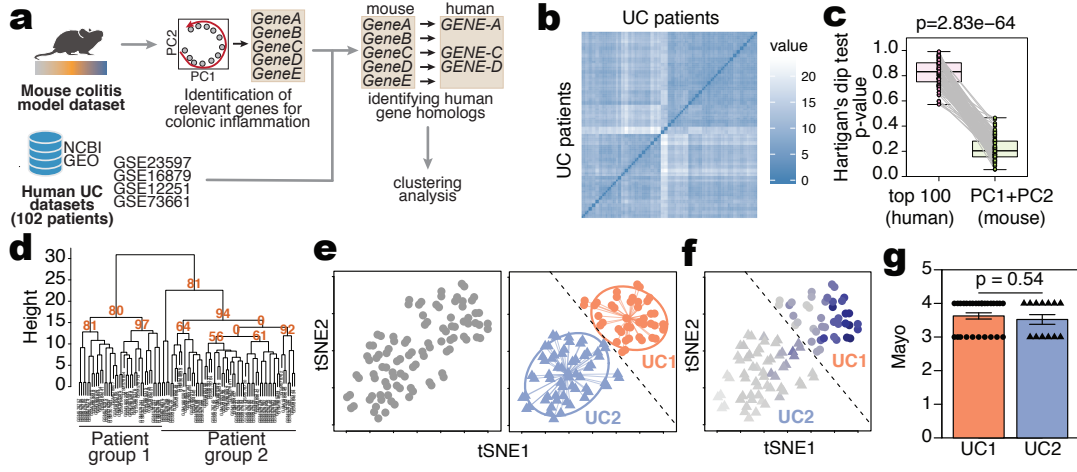

Figure 4

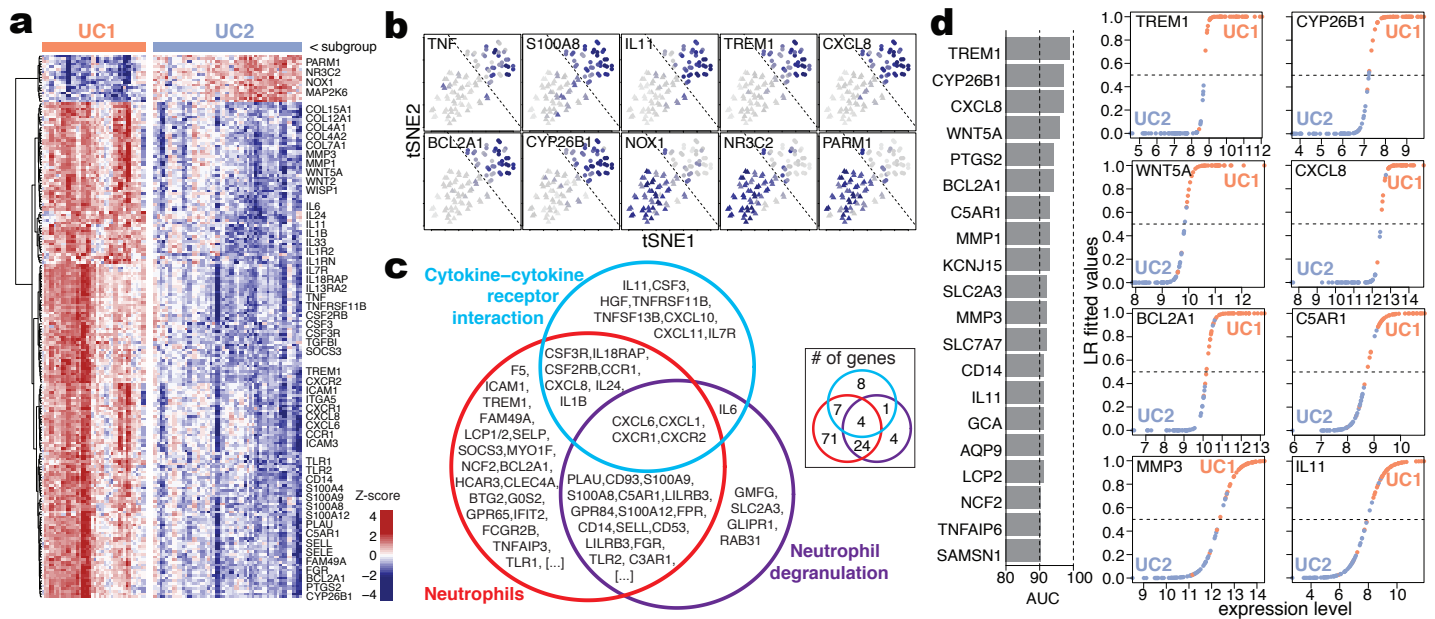

Figure 5

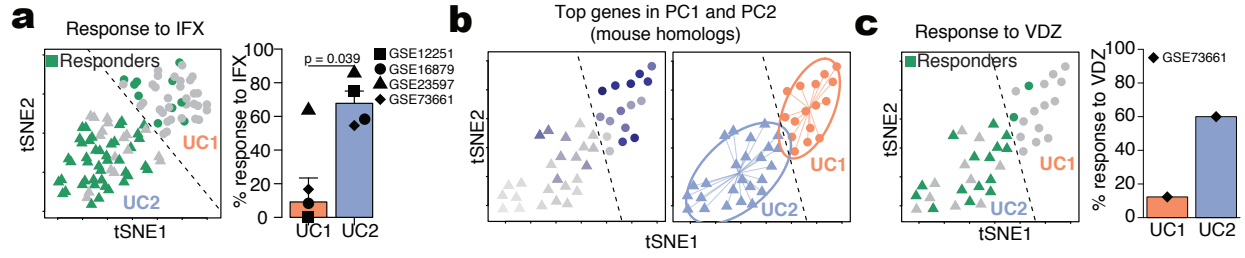

Figure S1

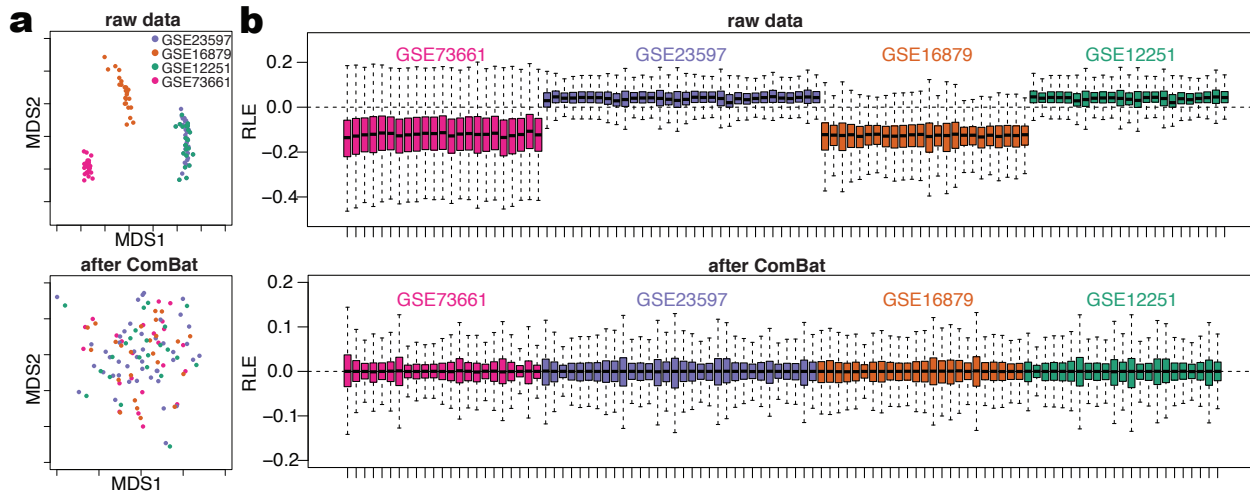

Figure S2

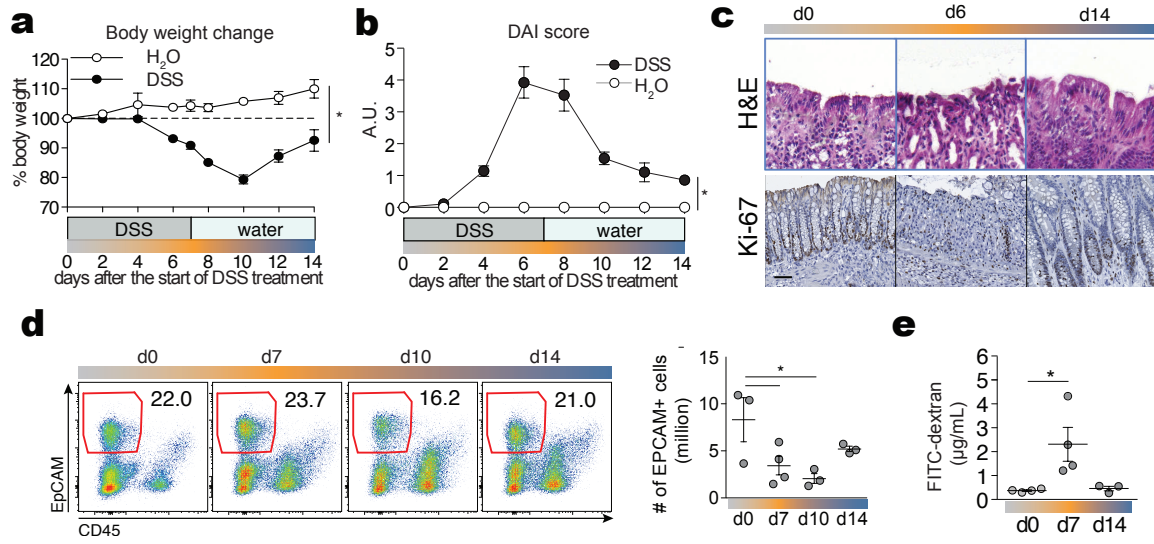

Figure S3

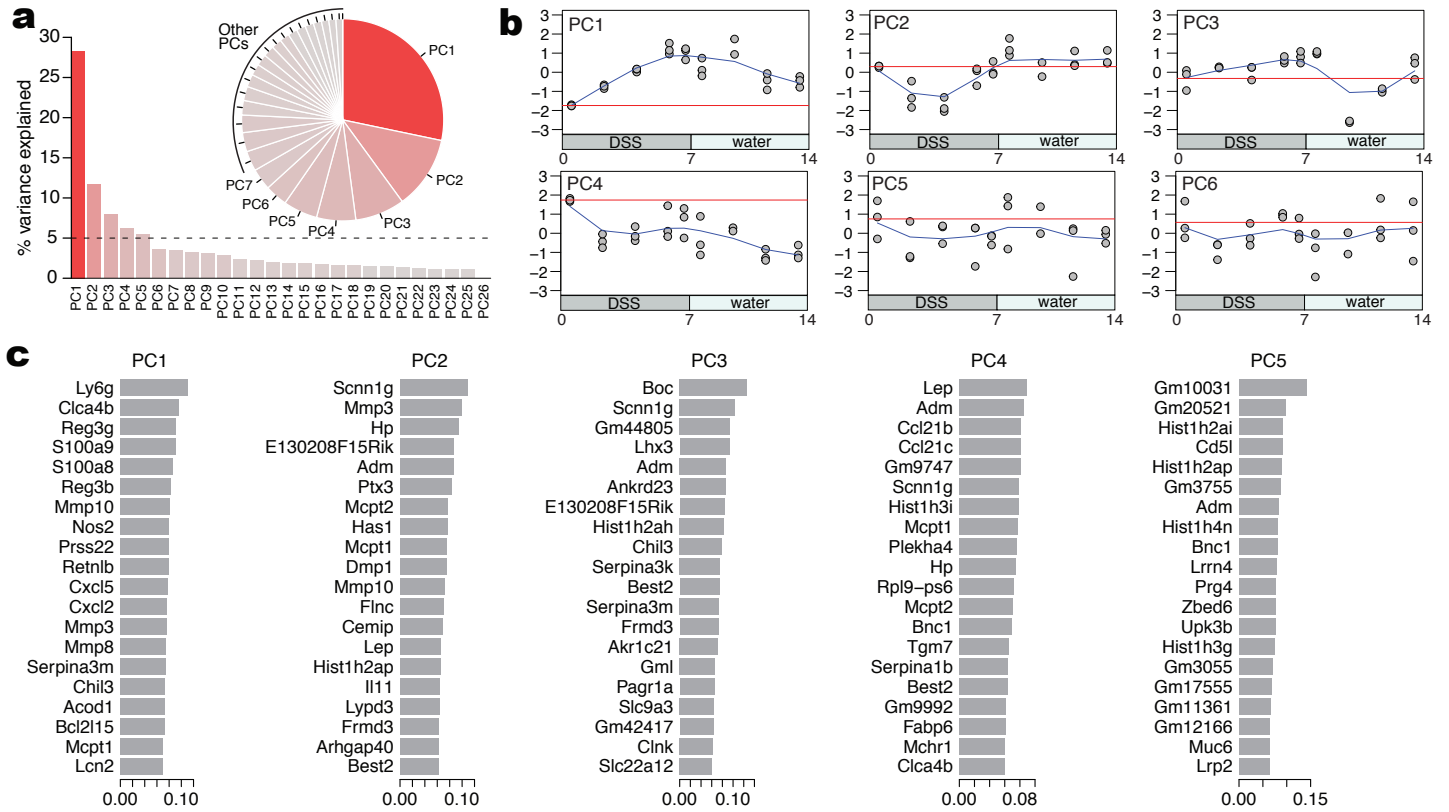



Figure S4

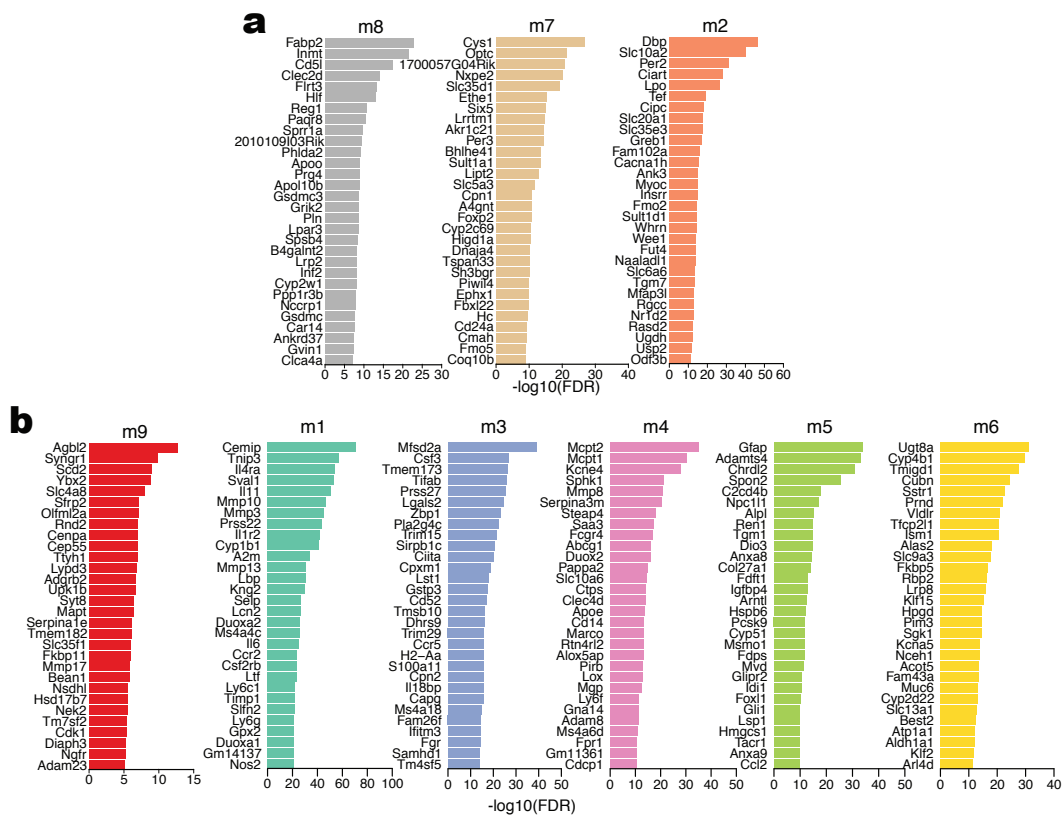

# Figure S5

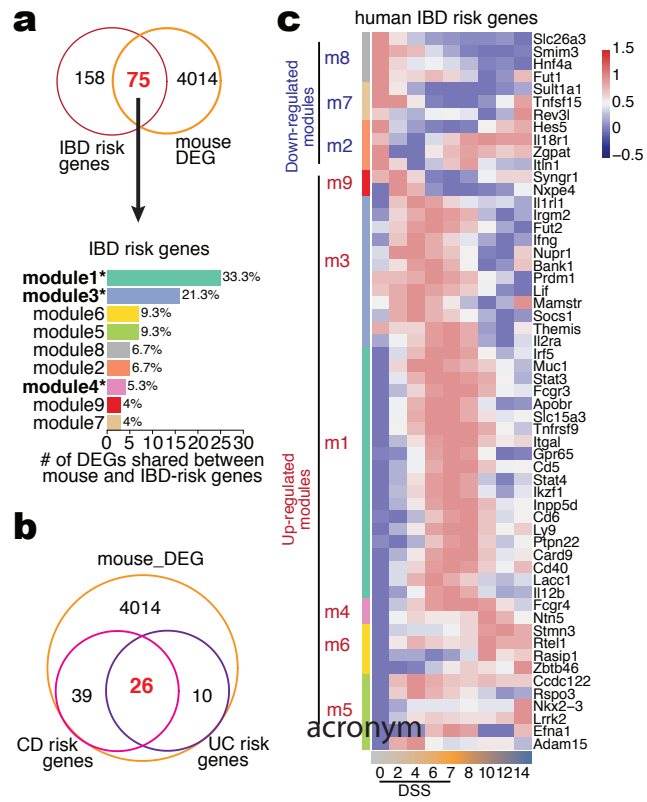

# Figure S6

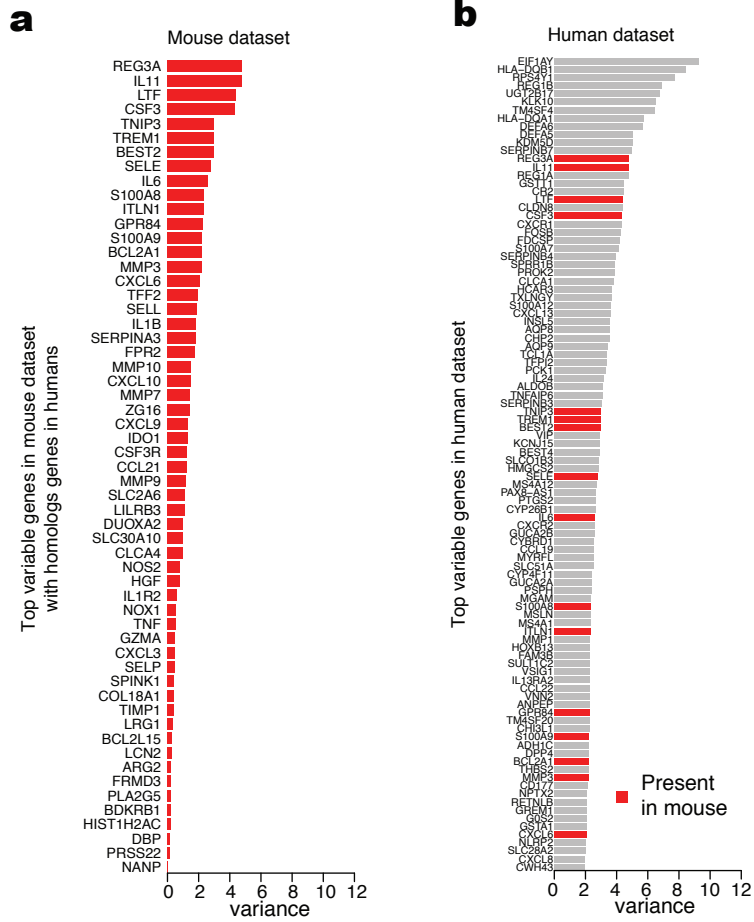

# Figure S7

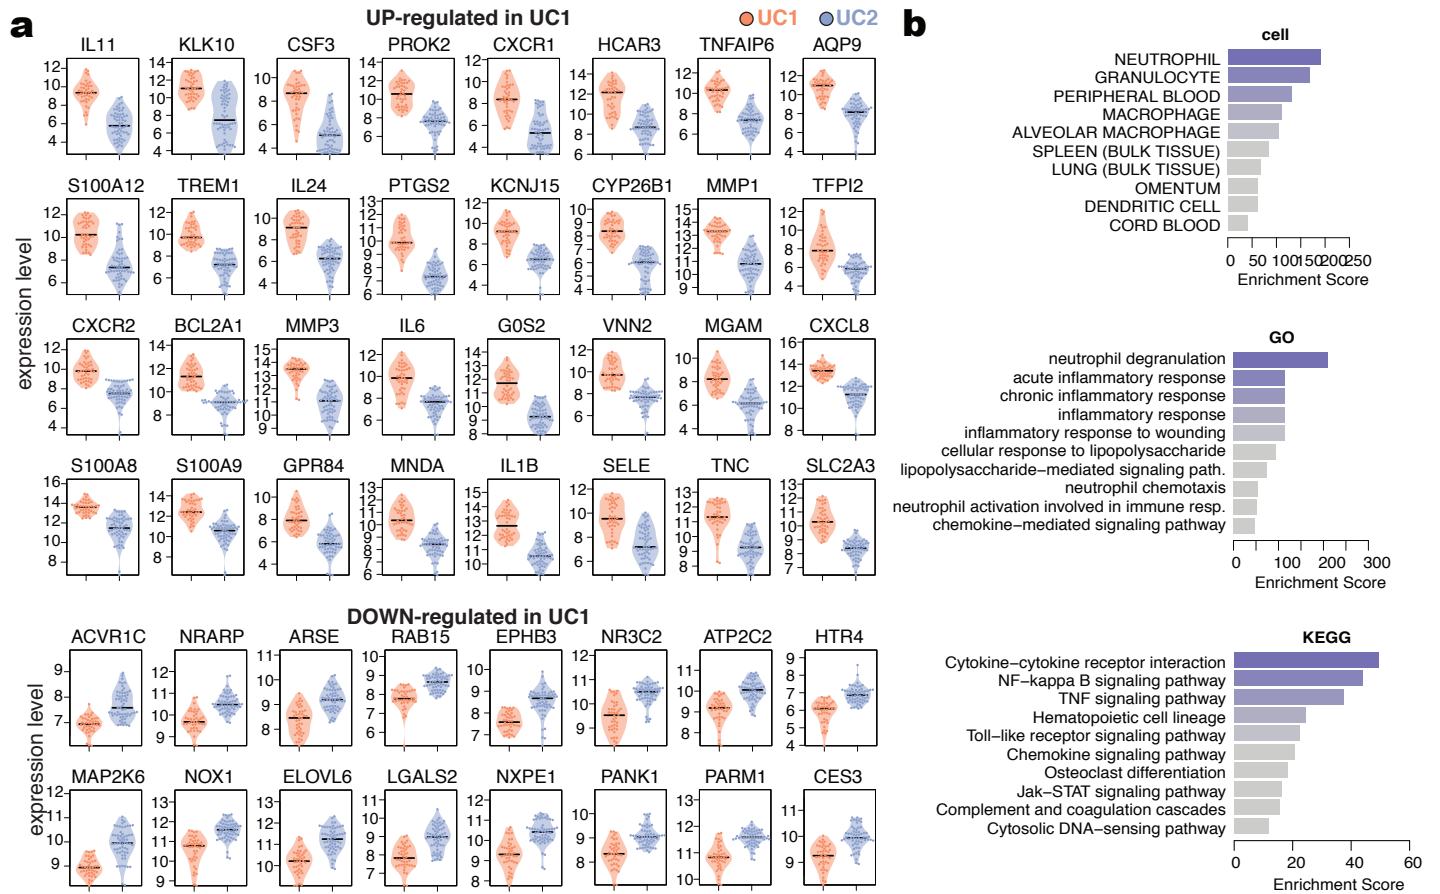

Source: https://biorxiv.org/content/biorxiv/early/2019/01/16/520379.full-text.pdf
